# Supplementary material for: Association Between Child Stunting and Handwashing facility with Spatial and Stratified Analysis Among Under Five based on Nationally Representative Health and Demographic Survey
Source: Research Square preprint supplement (doi:10.21203/rs.3.rs-7114856/v1), 2025-07-28
Supplement: Supplementary file 1 [file 0ee15f0b38ad1f26c02d5a45.docx]

**Table 1: Descriptive Statistics of Key Variables (N = 4,420)**

| **Variable** | **Category** | **Frequency** | **Percent (%)** |
| --- | --- | --- | --- |
| Child Stunting Status | Not Stunted | 3,245 | 73.42 |
|  | Stunted | 1,015 | 22.96 |
|  | Missing | 160 | 3.62 |
| Handwashing Exposure | No facility | 502 | 11.36 |
|  | Basic | 2,219 | 50.20 |
|  | Advanced | 1,699 | 38.44 |
| Child Age Category | 0–5 months | 478 | 10.81 |
|  | 6–11 months | 490 | 11.09 |
|  | 12–23 months | 836 | 18.91 |
|  | 24–59 months | 2,616 | 59.19 |
| Child Sex | Male | 2,249 | 50.88 |
|  | Female | 2,171 | 49.12 |
| Mother’s Education | No education | 261 | 6.22 |
|  | Primary | 952 | 22.67 |
|  | Secondary | 2,187 | 52.08 |
|  | Higher | 799 | 19.03 |
| Household Wealth Index | Poorest | 940 | 21.27 |
|  | Poorer | 876 | 19.82 |
|  | Middle | 880 | 19.91 |
|  | Richer | 857 | 19.39 |
|  | Richest | 867 | 19.62 |
| Place of Residence | Urban | 1,421 | 32.15 |
|  | Rural | 2,999 | 67.85 |
| Division | Barishal | 510 | 11.54 |
|  | Chattogram | 748 | 16.92 |
|  | Dhaka | 650 | 14.71 |
|  | Khulna | 467 | 10.57 |
|  | Mymensingh | 534 | 12.08 |
|  | Rajshahi | 437 | 9.89 |
|  | Rangpur | 507 | 11.47 |
|  | Sylhet | 567 | 12.83 |
| Household Size Category | *>*5 | 1,962 | 44.39 |
|  | *≤*5 | 2,458 | 55.61 |
| Sex of Household Head | Male | 3,851 | 87.13 |
|  | Female | 569 | 12.87 |
| Household Age Category | 16–20 | 35 | 0.79 |
|  | 21–30 | 839 | 18.98 |
|  | 31–40 | 1,560 | 35.29 |
|  | 41–50 | 708 | 16.02 |
|  | 51–60 | 636 | 14.39 |
|  | 61–70 | 482 | 10.90 |
|  | 71+ | 160 | 3.62 |

**Table 2: Bivariate Analysis Between Child Stunting and Handwashing Facility**

Predictor Child Stunting *χ*2 df *p*

|  | Not Stunted | Stunted |  | | |
| --- | --- | --- | --- | --- | --- |
| **Handwashing Facility**  No handwashing | 356 | 119 | 62.82*** | 2 | <.001 |
| Basic handwashing | 1,733 | 403 |  |  |  |
| Advanced handwashing | 1,156 | 493 |  |  |  |
| **Child Age Category**  0-5 months | 391 | 57 | 58.28*** | 3 | <.001 |
| 6-11 months | 398 | 81 |  |  |  |
| 12-23 months | 571 | 232 |  |  |  |
| 24-59 months | 1,885 | 645 |  |  |  |
| **Child Sex**  Male | 1,650 | 519 | 0.03 | 1 | .874 |
| Female | 1,595 | 496 |  |  |  |
| **Mother’s Education**  No education | 147 | 105 | 127.21*** | 3 | <.001 |
| Primary | 647 | 284 |  |  |  |
| Secondary | 1,650 | 479 |  |  |  |
| Higher | 676 | 94 |  |  |  |
| **Household Wealth Index**  Poorest | 597 | 326 | 141.74*** | 4 | <.001 |
| Poorer | 618 | 233 |  |  |  |
| Middle | 651 | 200 |  |  |  |
| Richer | 664 | 153 |  |  |  |
| Richest | 715 | 103 |  |  |  |
| **Place of Residence**  Urban | 1,066 | 283 | 8.82** | 1 | <.003 |
| Rural | 2,179 | 732 |  |  |  |
| **Division** |  |  | 36.09*** | 7 | <.001 |
| Barishal | 380 | 116 |  | | |
| Chattogram | 554 | 178 |  | | |
| Dhaka | 478 | 129 |  | | |
| Khulna | 362 | 88 |  | | |
| Mymensingh | 382 | 143 |  | | |
| Rajshahi | 331 | 82 |  | | |
| Rangpur | 387 | 104 |  | | |
| Sylhet | 371 | 175 |  | | |
|  |  |  | Continued on next page | | |

**Table 2 – continued from previous page**

Predictor Child Stunting *χ*2 df *p*

|  | Not Stunted | Stunted |  |  |  |
| --- | --- | --- | --- | --- | --- |
| **Household Size**  <=5 members | 1,419 | 462 | 1.00 | 1 | .317 |
| 5 members | 1,826 | 553 |  |  |  |
| **Household Head Sex**  Male | 2,824 | 890 | 0.30 | 1 | .584 |
| Female | 421 | 125 |  |  |  |
| **Household Head Age**  16-20 years | 29 | 6 | 14.93* | 6 | <.021 |
| 21-30 years | 589 | 222 |  |  |  |
| 31-40 years | 1,141 | 363 |  |  |  |
| 41-50 years | 511 | 172 |  |  |  |
| 51-60 years | 484 | 120 |  |  |  |
| 61-70 years | 370 | 101 |  |  |  |
| 71+ years | 121 | 31 |  |  |  |

Note. N = 4,260 for all analyses except Mother’s Education (N = 4,082).

**p* < .05, ***p* < .01, ****p* <.001

**Table 3: Logistic Regression Models of Child Stunting: Crude, Adjusted, and Residence- Stratified Results**

Model Stratified Models

| Predictor | OR (95% CI) | AOR (95% CI) |  | Urban OR | Rural OR |  |
| --- | --- | --- | --- | --- | --- | --- |
| **Handwashing Facility**  Basic vs. None | 0.70** (0.55, 0.88) | 0.71* (0.53, 0.95) |  | 0.78 | 0.69* |  |
| Advanced vs. None | 1.28* (1.01, 1.61) | 0.86 (0.64, 1.17) |  | 0.88 | 0.86 |  |

Note: *p < 0.05, **p < 0.01
